# Supplementary material
Source: ML conference proceedings conference paper supplement (https://aclanthology.org/2026.semeval-1.454)

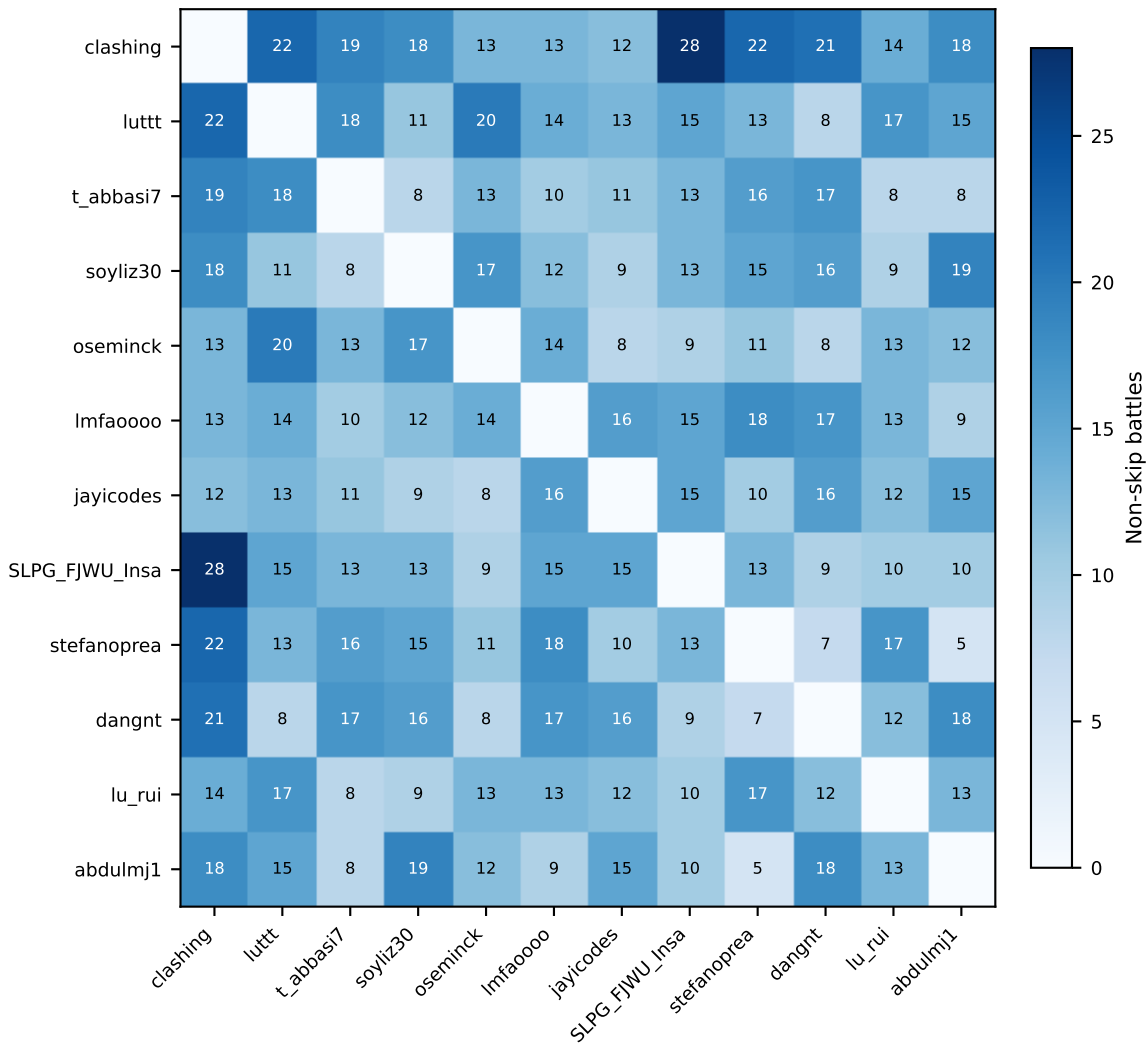

Supplement: SupplementaryMaterial [file battle_heatmap.pdf › img/battle_heatmap.pdf]

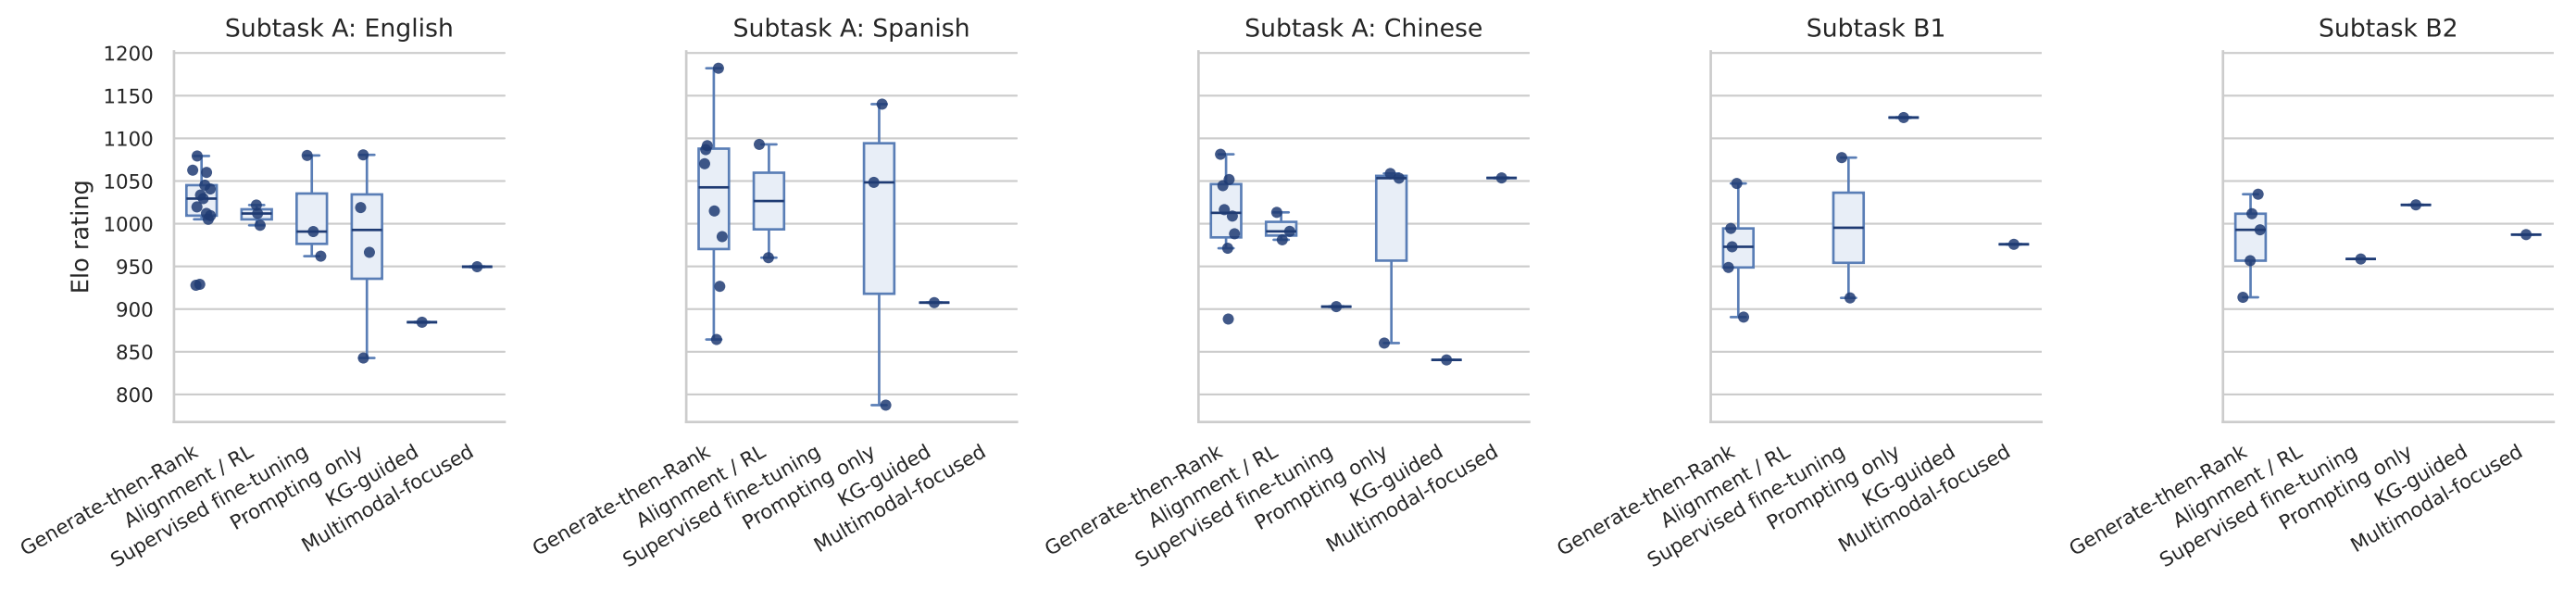

Supplement: SupplementaryMaterial [file elo_by_category.pdf › img/elo_by_category.pdf]

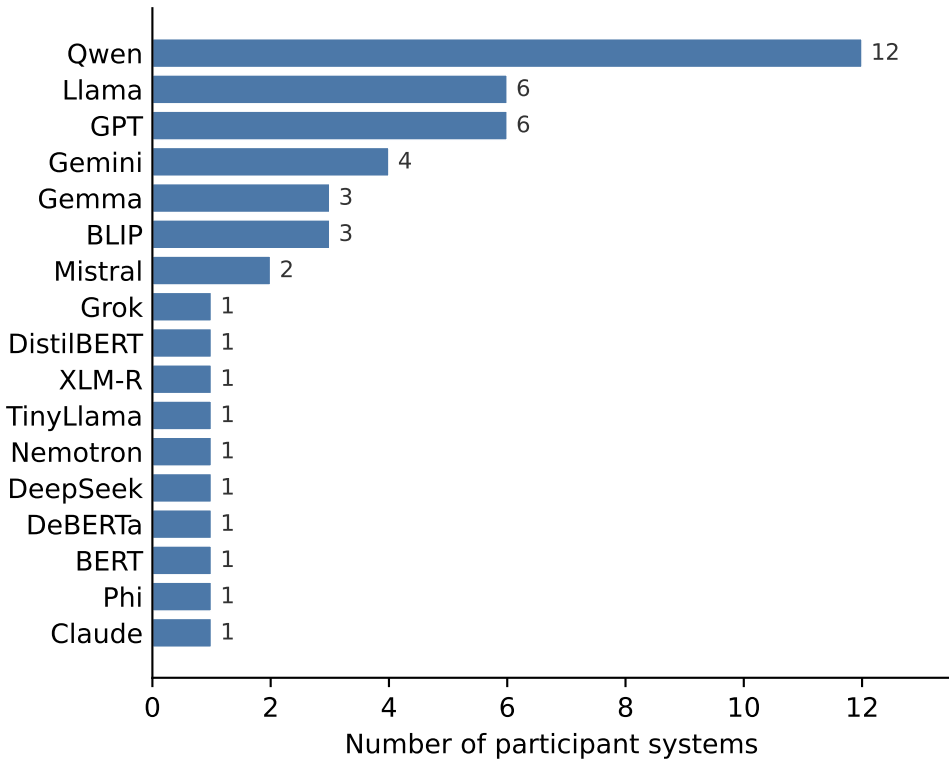

Supplement: SupplementaryMaterial [file model_families.pdf › img/model_families.pdf]

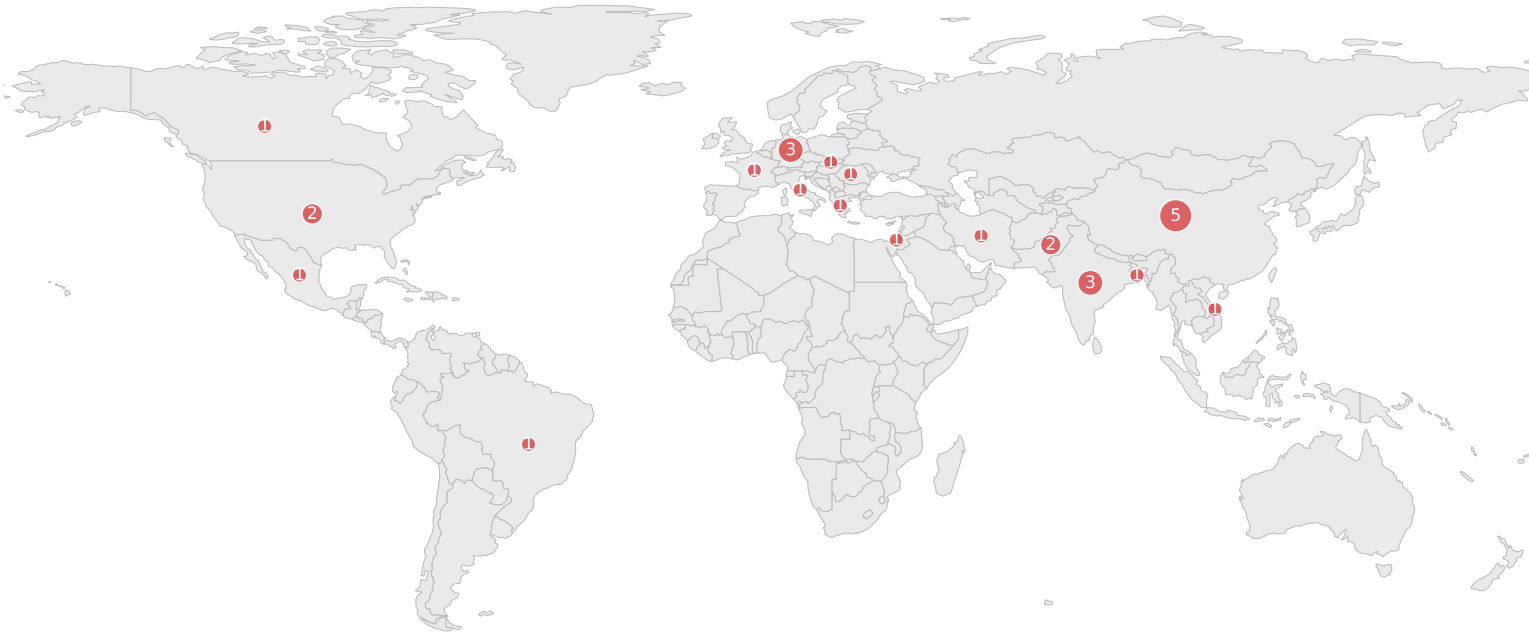

Supplement: SupplementaryMaterial [file participation_map.pdf › img/participation_map.pdf]

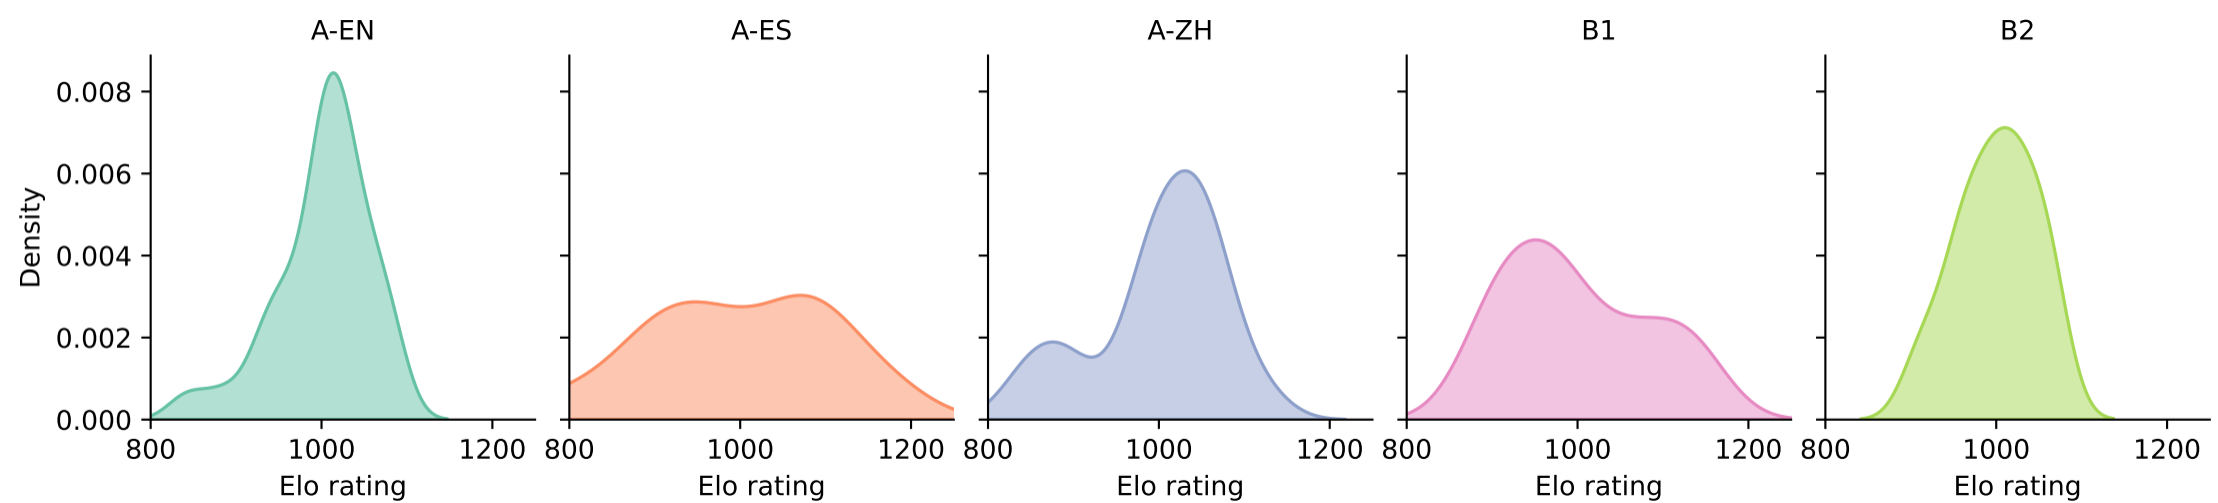

Supplement: SupplementaryMaterial [file rating_distribution.pdf › img/rating_distribution.pdf]

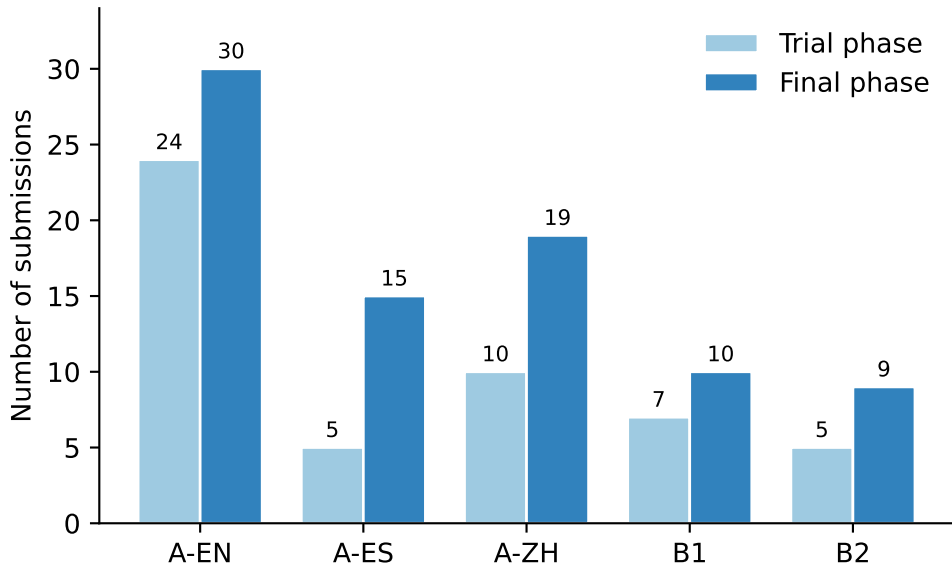

Supplement: SupplementaryMaterial [file submissions_per_subtask.pdf › img/submissions_per_subtask.pdf]

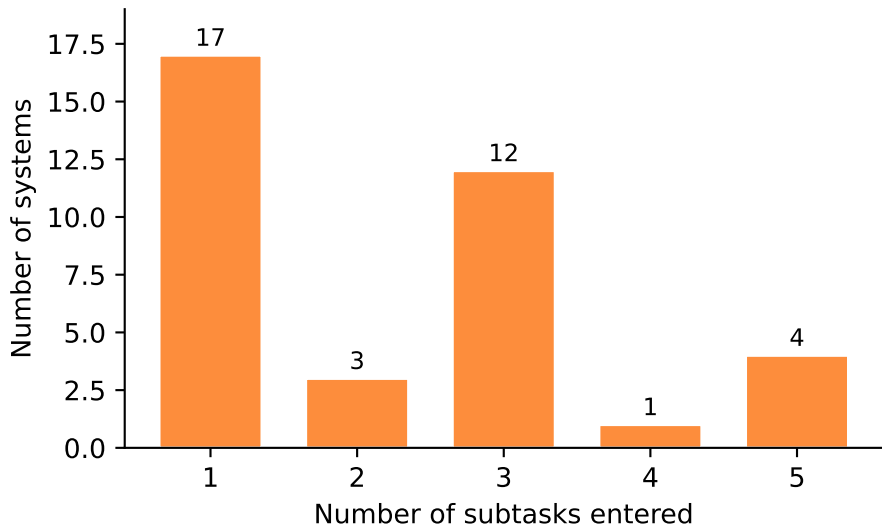

Supplement: SupplementaryMaterial [file subtask_breadth.pdf › img/subtask_breadth.pdf]

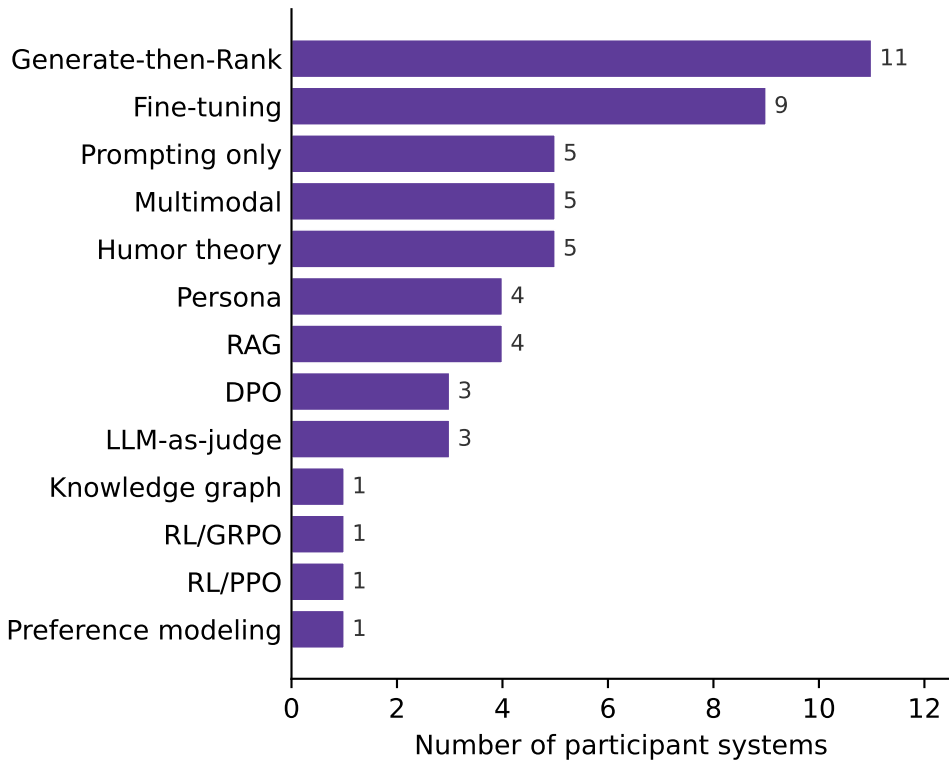

Supplement: SupplementaryMaterial [file techniques.pdf › img/techniques.pdf]

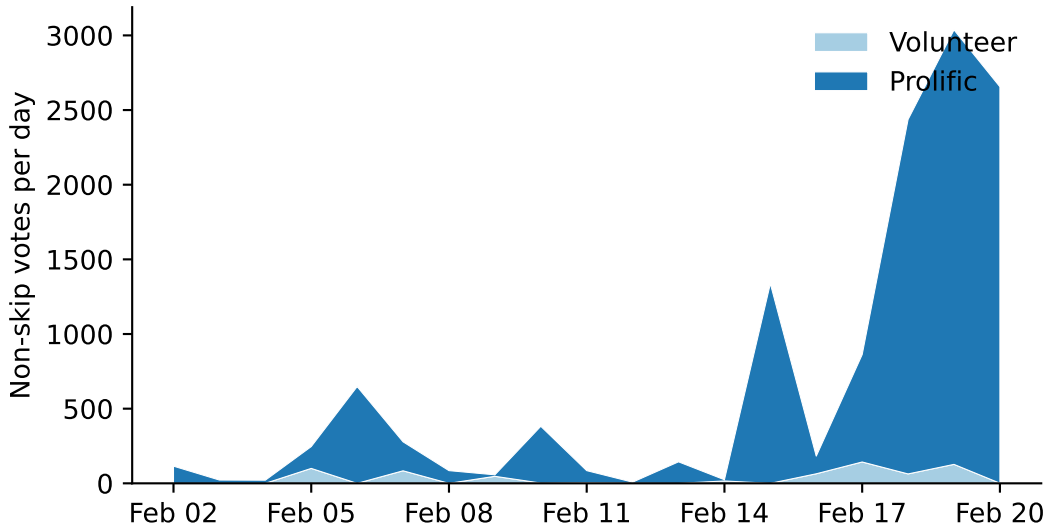

Supplement: SupplementaryMaterial [file vote_timeline.pdf › img/vote_timeline.pdf]
